# Supplementary material for: Drinking Water Intake Is Associated with Higher Diet Quality among French Adults
Source: PubMed Central journal article supplement (PMC5133077; doi:10.3390/nu8110689), 2016-10-31
Supplement: nutrients-08-00689-s001.pdf [file nutrients-08-00689-s001.pdf]

# Supplementary Materials: Drinking Water Intake Is Associated with Higher Diet Quality among French Adults

Rozenn Gazan, Juliette Sondey, Matthieu Maillot, Isabelle Guelinckx and Anne Lluch

Table S1. Food categorisations <sup>1</sup>.

| <b>Food Groups</b>          | <b>Subgroups</b>                                                                                |
|-----------------------------|-------------------------------------------------------------------------------------------------|
| Fruits and vegetables       | Vegetables (cooked and raw) and soup<br>Fresh and processed fruits<br>Dried fruits and oilseeds |
| Starches                    | Refined starches<br>Not refined starches<br>Ready to eat cereals                                |
| Meats/Fishes/Eggs           | Eggs<br>Fishes<br>Meats                                                                         |
| Mixed dishes and sandwiches | Mixed dishes<br>Sandwiches and savoury puff pastries                                            |
| Dairy products              | Milk<br>Fresh dairies<br>Cheese                                                                 |
| Sweet products              | Dairy dessert<br>Cake, pies, sweet pastries<br>Biscuits and sweets                              |
| Drinking water              | Tap water<br>Non-carbonated bottled water<br>Carbonated bottled water                           |
| Beverages                   | Hot drinks (tea and coffee)<br>Diet sweet beverages<br>Sweet beverages<br>Fruit juices          |
| Added fats                  | Animal fats<br>Vegetable fats<br>Spices and sauces                                              |

<sup>1</sup> Subgroups considered as a fluid are in bold.

**Table S2.** Fat intakes (% energy) and micronutrient intakes (mg/day or µg/day) across tertiles by gender (means are adjusted for energy) <sup>1</sup>.

| Variables                        | Men                              |               |                |               |                |                |             | Women                            |               |                |               |                |                |                          |
|----------------------------------|----------------------------------|---------------|----------------|---------------|----------------|----------------|-------------|----------------------------------|---------------|----------------|---------------|----------------|----------------|--------------------------|
|                                  | Tertile of Drinking Water Intake |               |                |               | p <sup>†</sup> | p <sup>‡</sup> | p for Trend | Tertile of Drinking Water Intake |               |                |               | p <sup>†</sup> | p <sup>‡</sup> | p for Trend <sup>§</sup> |
|                                  | All                              | ≤474 mL/Day   | 474–879 mL/Day | >879 mL/Day   |                |                |             | All                              | ≤500 mL/Day   | 500–934 mL/Day | >934 mL/Day   |                |                |                          |
| Mean ± SD                        | Mean ± SD                        | Mean ± SD     | Mean ± SD      | Mean ± SD     | Mean ± SD      | Mean ± SD      | Mean ± SD   | Mean ± SD                        | Mean ± SD     | Mean ± SD      | Mean ± SD     |                |                |                          |
| Linoleic acid (%energy)          | 4.9 ± 2.0                        | 4.8 ± 2.0     | 4.9 ± 2.0      | 4.9 ± 2.1     | 0.813          | 0.569          |             | 5.3 ± 1.8                        | 5.2 ± 1.9     | 5.3 ± 1.6      | 5.3 ± 2.0     | 0.800          | 0.904          |                          |
| α-Linolenic acid (%energy)       | 0.5 ± 0.2                        | 0.5 ± 0.3     | 0.4 ± 0.2      | 0.5 ± 0.3     | 0.085          | 0.053          |             | 0.5 ± 0.2                        | 0.5 ± 0.2     | 0.5 ± 0.2      | 0.5 ± 0.2     | 0.017          | 0.017          | 0.877                    |
| Magnesium (mg/day)               | 344.2 ± 5.2                      | 328.9 ± 4.1   | 340.7 ± 5.1    | 363.1 ± 6.2   | <0001          | 0.016          | 0.004       | 287.5 ± 4.3                      | 265.5 ± 3.7   | 289.6 ± 3.9    | 307.4 ± 5.4   | <0001          | <0001          | <0001                    |
| Calcium (mg/day)                 | 971.0 ± 20.5                     | 944.5 ± 26.0  | 948.2 ± 18.4   | 1020.3 ± 17.2 | 0.006          | 0.026          | 0.053       | 836.4 ± 15.3                     | 752.8 ± 14.0  | 837.6 ± 14.7   | 918.9 ± 17.2  | <0001          | <0001          | <0001                    |
| Copper (mg/day)                  | 1.7 ± 0.1                        | 1.6 ± 0.1     | 1.6 ± 0.1      | 1.7 ± 0.1     | 0.310          | 0.126          |             | 1.4 ± 0.1                        | 1.3 ± 0.1     | 1.4 ± 0.1      | 1.6 ± 0.1     | 0.005          | 0.004          | 0.001                    |
| Iron (mg/day)                    | 13.0 ± 0.2                       | 12.9 ± 0.2    | 13.3 ± 0.2     | 13.0 ± 0.2    | 0.392          | 0.566          |             | 10.5 ± 0.2                       | 9.9 ± 0.1     | 10.4 ± 0.2     | 11.1 ± 0.2    | <0001          | <0001          | <0001                    |
| Phosphorus (mg/day)              | 1411.0 ± 14.9                    | 1423.8 ± 19.7 | 1409.7 ± 12.7  | 1399.6 ± 12.4 | 0.564          | 0.218          |             | 1114.0 ± 12.3                    | 1089.5 ± 12.0 | 1121.0 ± 12.1  | 1131.6 ± 12.9 | 0.055          | 0.149          |                          |
| Iodin (mg/day)                   | 142.8 ± 3.3                      | 142.6 ± 3.6   | 143.2 ± 3.2    | 142.6 ± 3.2   | 0.986          | 0.958          |             | 121.2 ± 2.3                      | 115.4 ± 2.2   | 121.5 ± 2.0    | 126.7 ± 2.6   | 0.003          | 0.038          | 0.011                    |
| Selenium (mg/day)                | 86.5 ± 1.9                       | 87.4 ± 2.4    | 87.9 ± 2.2     | 84.2 ± 1.2    | 0.211          | 0.232          |             | 77.7 ± 2.0                       | 75.4 ± 1.7    | 79.2 ± 2.4     | 78.5 ± 1.8    | 0.141          | 0.334          |                          |
| Zinc (mg/day)                    | 12.1 ± 0.2                       | 12.3 ± 0.2    | 12.3 ± 0.2     | 11.9 ± 0.2    | 0.098          | 0.085          |             | 9.0 ± 0.1                        | 8.7 ± 0.1     | 9.1 ± 0.2      | 9.2 ± 0.1     | 0.024          | 0.013          | 0.005                    |
| Vitamin A (µg/day)               | 1250.1 ± 55.9                    | 1239.2 ± 72.0 | 1203.3 ± 49.3  | 1307.7 ± 46.3 | 0.206          | 0.020*         | 0.161       | 1071.4 ± 43.9                    | 1032.2 ± 49.1 | 1044.2 ± 32.7  | 1137.9 ± 49.8 | 0.145          | 0.128          |                          |
| Vitamin B <sub>1</sub> (mg/day)  | 1.3 ± 0.1                        | 1.3 ± 0.1     | 1.3 ± 0.1      | 1.3 ± 0.1     | 0.891          | 0.606          |             | 1.1 ± 0.1                        | 1.1 ± 0.1     | 1.1 ± 0.1      | 1.2 ± 0.1     | 0.033*         | 0.270          |                          |
| Vitamin B <sub>2</sub> (mg/day)  | 1.8 ± 0.1                        | 1.9 ± 0.1     | 1.8 ± 0.1      | 1.8 ± 0.1     | 0.524          | 0.218          |             | 1.6 ± 0.1                        | 1.5 ± 0.1     | 1.6 ± 0.1      | 1.6 ± 0.1     | 0.030*         | 0.222          |                          |
| Niacin (mg/day)                  | 21.6 ± 0.4                       | 21.2 ± 0.4    | 21.6 ± 0.5     | 22.2 ± 0.3    | 0.134          | 0.497          |             | 16.7 ± 0.4                       | 15.8 ± 0.3    | 16.6 ± 0.3     | 17.6 ± 0.5    | 0.007*         | 0.084          |                          |
| Pantothenic acid (mg/day)        | 5.6 ± 0.1                        | 5.8 ± 0.1     | 5.6 ± 0.1      | 5.6 ± 0.1     | 0.365          | 0.094          |             | 4.6 ± 0.1                        | 4.5 ± 0.1     | 4.6 ± 0.1      | 4.8 ± 0.1     | 0.014*         | 0.078          |                          |
| Vitamin B <sub>6</sub> (mg/day)  | 1.9 ± 0.1                        | 1.9 ± 0.1     | 1.9 ± 0.1      | 1.9 ± 0.1     | 0.978          | 0.811          |             | 1.6 ± 0.1                        | 1.5 ± 0.1     | 1.5 ± 0.1      | 1.6 ± 0.1     | 0.002          | 0.032          | 0.009                    |
| Folic Acid (mg/day)              | 307.5 ± 6.0                      | 300.1 ± 6.7   | 307.9 ± 6.0    | 314.6 ± 5.4   | 0.251          | 0.557          |             | 271.6 ± 5.6                      | 257.0 ± 5.5   | 271.0 ± 5.6    | 286.8 ± 5.6   | 0.001*         | 0.009*         | 0.002                    |
| Vitamin B <sub>12</sub> (µg/day) | 6.6 ± 0.3                        | 6.8 ± 0.3     | 6.7 ± 0.3      | 6.5 ± 0.3     | 0.769          | 0.751          |             | 5.2 ± 0.2                        | 4.9 ± 0.2     | 5.1 ± 0.2      | 5.4 ± 0.2     | 0.164          | 0.199          |                          |
| Vitamin C (mg/day)               | 91.9 ± 3.8                       | 90.1 ± 3.6    | 89.4 ± 3.6     | 96.4 ± 4.3    | 0.482          | 0.326          |             | 95.2 ± 3.1                       | 85.6 ± 2.7    | 100.4 ± 3.7    | 99.7 ± 3.0    | 0.001          | 0.002          | 0.002                    |
| Vitamin D (µg/day)               | 2.8 ± 0.1                        | 2.7 ± 0.1     | 2.8 ± 0.1      | 3.0 ± 0.1     | 0.088          | 0.068          |             | 2.5 ± 0.1                        | 2.6 ± 0.2     | 2.5 ± 0.1      | 2.5 ± 0.1     | 0.838          | 0.740          |                          |
| Vitamin E (mg/day)               | 13.2 ± 0.5                       | 12.4 ± 0.5    | 13.3 ± 0.5     | 13.9 ± 0.4    | 0.065          | 0.150          |             | 12.3 ± 0.3                       | 11.9 ± 0.3    | 12.1 ± 0.3     | 12.8 ± 0.3    | 0.080          | 0.247          |                          |

<sup>1</sup> Values are survey-weighted means with standard deviations; † adjustment for energy intake (except for energy and variables expressed in % energy); ‡ adjustment for energy intake (except for energy and variables expressed in % energy), level of education, socio-occupational group, season, level of physical activity, smoker status, region, and quintile of income per consumption unit (ICU); § calculated only for significant differences.
